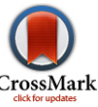

# Novel Rearrangements in the Staphylococcal Cassette Chromosome *Mec* Type V Elements of Indian ST772 and ST672 Methicillin Resistant *Staphylococcus aureus* Strains

Jayanth Balakuntla<sup>1</sup>, Sushma Prabhakara<sup>1</sup>, Gayathri Arakere\*

Society for Innovation and Development, Indian Institute of Science, Bangalore, India

## Abstract

*Staphylococcus aureus* is a commensal gram positive bacteria which causes severe and non severe infections in humans and livestock. In India, ST772 is a dominant and ST672 is an emerging clone of *Staphylococcus aureus*. Both cause serious human diseases, and carry type V SCCmec elements. The objective of this study was to characterize SCCmec type V elements of ST772 and ST672 because the usual PCR methods did not amplify all primers specific to the type. Whole genome sequencing analysis of seven ST772 and one ST672 *S. aureus* isolates revealed that the SCCmec elements of six of the ST772 isolates were the smallest of the extant type V elements and in addition have several other novel features. Only one ST772 isolate and the ST672 isolate carried bigger SCCmec cassettes which were composites carrying multiple *ccrC* genes. These cassettes had some similarities to type V SCCmec element from M013 isolate (ST59) from Taiwan in certain aspects. SCCmec elements of all Indian isolates had an inversion of the *mec* complex, similar to the bovine SCCmec type X. This study reveals that six out of seven ST772 *S. aureus* isolates have a novel type V (5C2) SCCmec element while one each of ST772 and ST672 isolates have a composite SCCmec type V element (5C2&5) formed by the integration of type V SCCmec into a MSSA carrying a SCC element, in addition to the *mec* gene complex inversions and extensive recombinations.

**Citation:** Balakuntla J, Prabhakara S, Arakere G (2014) Novel Rearrangements in the Staphylococcal Cassette Chromosome *Mec* Type V Elements of Indian ST772 and ST672 Methicillin Resistant *Staphylococcus aureus* Strains. PLoS ONE 9(4): e94293. doi:10.1371/journal.pone.0094293

**Editor:** Herminia de Lencastre, Rockefeller University, United States of America

**Received:** September 10, 2013; **Accepted:** March 15, 2014; **Published:** April 10, 2014

**Copyright:** © 2014 Balakuntla et al. This is an open-access article distributed under the terms of the Creative Commons Attribution License, which permits unrestricted use, distribution, and reproduction in any medium, provided the original author and source are credited.

**Funding:** This work has been made possible through a Department of Biotechnology grant (BT/IN/New Indigo/16/GA/2010) and Swedish International Development Agency grant to GA. The funders had no role in study design, data collection and analysis, decision to publish, or preparation of the manuscript.

**Competing Interests:** The authors have declared that no competing interests exist.

\* E-mail: gayathri.arakere@gmail.com

These authors contributed equally to this work.

## Introduction

*Staphylococcus aureus* is an important pathogen in hospitals and in communities causing a broad range of infections among both humans and animals. Treatment of severe infections is becoming a challenge due to development of multi-drug resistance. Methicillin resistance appeared soon after the introduction of this antibiotic in 1960. It is due to the presence of *mecA* gene coding for the protein PBP2A, which has a low affinity for  $\beta$ -lactam antibiotics [1–4]. The *mecA* gene is housed within a unique mobile genetic element known as Staphylococcal Cassette Chromosome *mec* (SCCmec) integrated in the staphylococcal genome. The SCCmec is comprised of (1) *mec* gene complex containing the *mecA* gene, its regulatory genes and associated insertion sequences, and (2) cassette chromosome recombinase (*ccr*) gene complex [5,6]. Six classes of *mec* gene complexes (A, B, C1, C2, D and E) and three *ccr* genes (*ccrA*, *ccrB* and *ccrC*) for integration and excision of the SCCmec element have been reported so far (www.sccmec.org). SCCmec elements are classified into types by the combination of the type of *ccr* gene complex and the class of *mec* gene complex. Eleven SCCmec elements are reported to date: SCCmec I to XI [5–8]. Among these, SCCmec types I–V are the most commonly reported. SCCmec types I–III are usually carried by hospital-

associated methicillin resistant *S. aureus* (HA-MRSA) while types IV and V are usually carried by community-associated (CA) MRSA. However, now the distinction between HA and CA MRSA is getting blurred [9].

The first isolate to be characterized with SCCmec element V(5C2) containing *ccrC* was *S. aureus* strain WBG8318 (WIS) belonging to ST45 from Australia. The next was TSGH17 from Taiwan with ST59 genetic background and with two *ccrCs* (5C2&5) [10–12]. Since then, many MRSA isolates such as M013 with SCCmec V elements containing two *ccrCs*, have been identified in various genetic backgrounds and with different *ccrCI* alleles [13,14].

ST772, known as the Bengal Bay clone, prevalent in Bangladesh, India, and Malaysia, is a single locus variant of ST1 in *pta* [15–18]. International travel has spread this clone to Japan and several European countries [19,20]. A recent German study has shown complex skin and soft tissue infections to be associated with Pantone-Valentine Leukocidin (PVL) positive ST772 *S. aureus* among individuals returning from Asia [21]. The PVL-positive ST772 carrying SCCmec element V is one of the predominant clones present in Indian hospitals and the community, and is known to cause serious diseases [16,17]. A PVL-negative ST672 clone carrying SCCmec element V is also circulating among

carriers and patients in India [22]. ST672 *S. aureus*, from Western Australia, carrying SCCmec elements IVa and V, is designated as a single locus variant of ST361 by Coombs et al. [23]. Very few ST672 isolates have been reported in the MLST database.

Two factors lead us to believe that the type V SCCmec elements of ST772 and ST672 could be different from each other and that of strain WIS. Firstly, primers identifying the *ccrC* and C2-*mec* gene complexes amplified while none of the joining (J) region primers amplified and secondly, during microarray analysis of SCCmec type V Indian isolates, ST772 and ST672 MRSA isolates tested positive for probe containing the *ccrAA*(MRSZAH47) region, while isolates belonging to ST8 were negative. This lead us to perform whole genome sequencing of 7 isolates of ST772 from different clinical backgrounds and one isolate of ST672 [16,17,22,24]. By identifying the SCCmec regions from whole genome sequences, we have shown that ST772 and ST672 SCCmec elements have novel rearrangements compared to extant type V elements.

## Results and Discussion

We chose seven ST772 isolates and one ST672 *S. aureus* isolate from different clinical backgrounds for whole genome sequencing. Table 1 shows details of Indian isolates investigated in the present study and other reference strains used in comparison of genomes of SCCmec elements along with their accession numbers.

We identified the SCCmec elements from whole genome sequences by using previously published "Chromosome"-SCCmec junction sequences at the SCC integration site. Six of the seven ST772 isolates with the exception of *S. aureus* 3957, carried SCCmec elements ranging in length from 24512 bp (LVP2) to 26528 bp (333). These are the smallest type V SCCmec elements so far reported with the number of open reading frames (orfs) varying between twenty six and twenty eight.

*S. aureus* 3957 contains the largest ST772 SCCmec element with 39 orfs. Table 2 presents data comparing the orfs present in the SCCmec element of 3957 to corresponding orthologs of one of the six similar ST772 isolates (118), ST672 isolate (GR1) and two reference strains WIS and M013 (representative of 5C2 and 5C2&5 SCCmec elements respectively). A similar Table S1 reports on the orfs present in the SCCmec element of *S. aureus* VH60 (highest number of orfs) in comparison with all the other ST772, ST672 and reference strains. While there is 100% identity in the sequence of rRNA methyl transferase (orfX), the hypothetical proteins (HPs) coded by orfs 2–8 and orfs 10–13 present in 3957 are not identified in 118. Two HPs coded by orfs 7 and 15 in VH60 are not identified in most of the isolates (Table S1). The sequenced isolates came from different clinical backgrounds and it is apparent that there are differences in HPs, insertional sequences and transposases.

### Small-sized SCCmec elements carried by six ST772 strains

*OrfX* insertion site and the characteristic terminal inverted and direct repeats, generated upon insertion of SCCmec, were almost similar to extant SCCmec elements. Genomic maps and comparison of SCCmec elements of strains WIS, 118 (representing six smaller ST772 SCCmec elements), 3957, GR1 and M013 are illustrated in Figure 1a drawn using Easy Fig software [25]. The differences and similarities between the genomic structures of various SCCmec elements are highlighted below.

Sequence analysis of this region from Figure 1a and Table 2 reveals large differences in HPs, IS431 transposases and the C2*mec* gene complex between WIS and 118, between 118 and 3957, and between 3957 and GR1 and M013. All sequenced isolates contain the class C2 *mec* gene complex; the arrangement of genes

downstream of *orfX* between the two IS431*mec* transposases however, are significantly different. In the SCCmec elements of ST772 and ST672 isolates, there are inversions in the *mec* gene complex with the absence of *mecR1/ΔmecR*. This inversion is similar to the inversion reported in isolate JCSC6945 (ST398) collected from a Canadian participant in an international Pig Veterinary Conference. JCSC6945 contains SCCmec element X with C1 *mec* gene complex, while ST772 and 672 isolates carry SCCmec element V with a C2 *mec* gene complex [7]. Figure 1b depicts similar *mec* gene complex inversions in strain 118 and JCSC6945 but with a different orientation of IS431 which might have occurred during a horizontal transfer. *S. aureus* ST398 is associated with livestock and human infections and is an important pathogen [26,27]. SCCmec type V element has been characterized recently in UMCG-M4, a ST398 human isolate containing PVL but does not harbour *mec* gene complex inversion [28].

Downstream of *mecA*, next to the second IS431, our isolates and M013, unlike WIS, contain a PhnB-like protein, which adopts structural folds similar to bleomycin resistance protein. The HPs downstream of the PhnB-like protein are similar among ST772, and ST672 isolates.

All the six isolates have similar arrangements with minor variations in HPs, IS431 transposases and non coding regions. IS431 transposases of all six isolates located at both upstream and downstream of the *mecA* gene are truncated to different extents as shown in Table S2. IS431 transposases (represented as *Δtnp* in figure 1) located at the downstream of *mecA* in strains VH60, 118, 333, 3989 and LVP2 are truncated to the same size (48 aa), while 120 has a larger sized *Δtnp* (157 aa). Similarly, IS431 transposases (represented as *Δtnp* in figure 1) located at the upstream of *mecA* in two isolates from eye infections, 333 and LVP2, have larger *Δtnps* (133, 155 aa respectively) while the *Δtnps* of 60, 118, 120 and 3989 are of same size (92 aa) and smaller. *S. aureus* 118 and all the other 5 isolates have a *ccrCI*(allele 2) downstream of the *mec* gene complex while WIS has *ccrCI*(allele 1). All six ST772 isolates and WIS carry SCCmec elements type V (5C2) although with many differences. It is evident that WIS and these 772 isolates have evolved independently. To our knowledge, no other type V (5C2 or 5C2&5) SCCmec element has been reported with inversion of the *mec* complex.

### SCCmec elements of *S. aureus* 3957, and GR1

While GR1 has two *Δtnps* of equal size, 3957 has an IS431 transposase at the upstream of *mecA* and an IS similar to IS1181 having a transposase of 440 amino acids long. Similar partial IS431 transposases have been found in *S. aureus* TSGH17 and ZH47. *S. aureus* 3957 and GR1 contain the same *mec* gene complex inversion as in other ST772 isolates and, in addition, type 5 *ccr* gene complex comprising of *ccrCI* (allele 8) in the region between *orfX* and *mec* gene complex. *S. aureus* 3957 and GR1 carry two other truncated (split) *ccrCs*, downstream of *mec* gene complex, split into two due to a frame shift mutation. Orfs 28 and 29 of 3957 and orfs 29 and 30 of GR1 have 98, 97, 100 and 95% identity respectively with *ccrC1* (allele 5) from *S. haemolyticus* JCSC1435 (YP\_251971.1) which is an intact protein of 558 amino acids carrying serine recombinase, zinc finger, and *flxA* domains. In GR1 split *ccrCs* are encoded by orf 29 (311 amino acids) and 30 (247 amino acids) carrying two recombinase domains (one serine recombinase and zinc finger domain, respectively) while in 3957, they are encoded on orf 28 (83 amino acids as initial part of serine recombinase) and orf 29 (478 amino acids) with latter part of serine recombinase, resolvase, zinc finger and *flxA* domains respectively. ClustalW alignments of the split *ccrCs* of *S. aureus* 3957 and GR1 with *ccrCI*(allele 5) sequences are shown in Figure

**Table 1.** Clinical history, molecular characterization and accession numbers of sequenced and reference isolates.

| Isolate/Strain        | Place/Source          | Clinical History    | Year of isolation | ST/CC   | PVL | Agr type | Gen Bank Accession No <sup>a</sup> | DDBJ Accession No <sup>b</sup> | SCCmec size (bp) | No of ORFs |
|-----------------------|-----------------------|---------------------|-------------------|---------|-----|----------|------------------------------------|--------------------------------|------------------|------------|
| 118                   | Bangalore / blood     | Pyomyositis         | 2008              | 772/1   | +   | II       | AJGE000000000                      | AB777516                       | 25,389           | 26         |
| VH60                  | Bangalore/nasal swab  | Carrier             | 2007              | 772/1   | +   | II       | ALWG000000000                      | AB781450                       | 25,396           | 28         |
| 3989                  | Hyderabad/sputa       | Pneumonitis         | 2007              | 772/1   | +   | II       | ALWH000000000                      | AB781447                       | 24,870           | 27         |
| 120                   | Bangalore/pus         | Cerebral Abscess    | 2009              | 772/1   | +   | II       | ALWE000000000                      | AB781444                       | 25,288           | 26         |
| 333                   | Madurai/corneal ulcer | Endophthalmitis     | 2010              | 772/1   | +   | II       | ALWF000000000                      | AB781445                       | 26,528           | 26         |
| LVP2                  | Bhubaneswar/keratitis | Microbial keratitis | 2010              | 772/1   | +   | II       | AOFV000000000                      | AB781449                       | 24,512           | 26         |
| 3957                  | Hyderabad/pus         | Breast abscess      | 2007              | 772/1   | +   | II       | AOFU000000000                      | AB781446                       | 36,199           | 39         |
| GR1                   | Delhi/blood           | Septicemia          | 2007              | 672/361 | -   | I        | AJLX000000000                      | AB781448                       | 34,776           | 40         |
| M013 <sup>c</sup>     | Taiwan/               | Wound Infection     | 2002              | 59      | +   | I        | CP003166                           | -                              | 41,265           | 39         |
| WIS <sup>d</sup>      | Australia             | Skin carriage       | 1995              | 45/45   | -   | -        | -                                  | AB121219                       | 28,612           | 25         |
| JCSC6945 <sup>e</sup> | Denmark               | Carrier             | 2006              | 398     | -   | -        | -                                  | AB505653.1                     | 51,483           | 54         |
| 85/2082 <sup>f</sup>  | Newzealand            |                     | 1985              | 239/8   | -   | I        |                                    | AB037670.1                     | 68,256           | 80         |

<sup>a</sup>: Whole genome sequenced contigs;

<sup>b</sup>: Annotations for the SCCmec region;

<sup>c</sup>Huang TW, Chen F, Miu WC, Liao TL, Lin AC, et al. (2012) J. Bacteriol 194:1256-1257;

<sup>d</sup>: O'Brien FG, Coombs GW, Pearson JC, Christiansen KJ, Grubb WB. (2005) Antimicrob. Agents Chemother 49: 5129-5132;

<sup>e</sup>: Li S, Skov RL, Han X, Larsen AR, Larsen J, et al. (2011) Antimicrob. Agents Chemother 55: 3046-3050;

<sup>f</sup>: Ito, T., Y. Katayama, K. Asada, N. Mori, K. Tsutsumimoto, C. Tiensasitorn, and K. Hiramatsu. 2001. Antimicrob. Agents Chemother. 45: 1323-1336.

doi:10.1371/journal.pone.0094293.t001

**Table 2.** Comparison of orfs from SCCmec elements of *S. aureus* 3957 and corresponding orthologs of other ST772, ST672 and reference strains.

|        |                      | Homology (%) <sup>a</sup>                                  |                 |                  |             |        |            |            |            |                |                              |     |            |               |
|--------|----------------------|------------------------------------------------------------|-----------------|------------------|-------------|--------|------------|------------|------------|----------------|------------------------------|-----|------------|---------------|
|        |                      | 118 (ST772)                                                |                 |                  | GR1 (ST672) |        |            | WIS (ST45) |            |                | M013 (ST59)                  |     |            | Others        |
| Orfs   | Position             | Predicted Function                                         | % Identity      | C O <sup>b</sup> | % Identity  | C O    | % Identity | C O        | % Identity | C O            | % Identity                   | C O | % Identity | C O           |
| orf 1  | 369..848, 160 aa     | rRNA methyltransferase                                     | 100             | 118.1            | 100         | GR1.1  | 100        | BAD2482.1  | 100        | YP_005296500.1 |                              |     |            |               |
| orf 2  | 1094..1399, 102 aa   | HP <sup>c</sup>                                            | NI <sup>f</sup> |                  | 100         | GR1.2  | NI         |            | 100        | YP_005296501.1 |                              |     |            |               |
| orf 3  | 1598..246, 288 aa    | HP                                                         | NI              |                  | 100         | GR1.3  | NI         |            | 100        | YP_005296502.1 |                              |     |            |               |
| orf 4  | 2569..4044, 492 aa   | HP                                                         | NI              |                  | 100         | GR1.4  | NI         |            | 100        | YP_005296504.1 |                              |     |            |               |
| orf 5  | 4270..5370, 367 aa   | HP (repair, recombination and replication)                 | NI              |                  | 100         | GR1.5  | 77.13      | BAD2483.1  | 100        | YP_005296505.1 |                              |     |            |               |
| orf 6  | 5363..5734, 124 aa   | HP                                                         | NI              |                  | 100         | GR1.6  | 81.15      | BAD2483.1  | 100        | YP_005296506.1 |                              |     |            |               |
| orf 7  | 5731..7374, 548 aa   | Putative Primase                                           | NI              |                  | 100         | GR1.7  | 81.38      | BAD2483.1  | 100        | YP_005296507.1 |                              |     |            |               |
| orf 8  | 7367..7444, 26 aa    | HP                                                         | NI              |                  | 100         | GR1.8  | NI         |            | 100        | YP_005296508.1 |                              |     |            |               |
| orf 9  | 7600..9276, 559 aa   | CcrI (allele 8)                                            | 95.2            | 118.17           | 99.82       | GR1.9  | 94.61      | BAD2483.1  | 100        | YP_005296509.1 |                              |     |            |               |
| orf 10 | 9382..9720, 113 aa   | HP                                                         | NI              |                  | 100         | GR1.10 | 49.55      | BAD2483.1  | NI         |                | 100 (ZH47)                   |     |            | CAL22884.1    |
| orf 11 | 9722..9823, 34 aa    | HP                                                         | NI              |                  | 100         | GR1.11 | NI         |            | NI         |                | 97 ( <i>S. epidermis</i> )   |     |            | EJE32225.1    |
| orf 12 | 9816..10127, 104 aa  | HP                                                         | NI              |                  | 100         | GR1.12 | 50.94      | BAD2483.1  | 100        | YP_005296510.1 |                              |     |            |               |
| orf 13 | 10143..10649, 169 aa | DUF1643 superfamily protein                                | NI              |                  | 100         | GR1.13 | 65.87      | BAD2483.1  | 100        | YP_005296511.1 |                              |     |            |               |
| orf 14 | 11277..10609, 223 aa | I5431 mec                                                  | 95.6            | 118.3            | 98.9        | GR1.14 | 99.04      | BAD2482.1  | 100        | YP_005296512.1 |                              |     |            |               |
| orf 15 | 11589..13595, 669 aa | Penicillin binding protein PBP2'                           | 100             | 118.4            | 100         | GR1.15 | 100        | BAD2482.1  | 100        | YP_005296516.1 |                              |     |            |               |
| orf 16 | 14069..13641, 143 aa | HP                                                         | 100             | 118.5            | 100         | GR1.16 | 100        | BAD2482.1  | 100        | YP_005296515.1 |                              |     |            |               |
| orf 17 | 14909..14166, 248 aa | ugpQ <sup>d</sup>                                          | 100             | 118.6            | 100         | GR1.17 | 100        | BAD2482.1  | 100        | YP_005296514.1 |                              |     |            |               |
| orf 18 | 15993..15826, 56 aa  | HMG-CoA                                                    | 100             | 118.7            | 100         | GR1.19 | NI         |            | 100        | YP_005296513.1 |                              |     |            |               |
| orf 19 | 16251..16334, 28 aa  | HP                                                         | NI              |                  | NI          | NI     | NI         |            | NI         |                | 88 (USA300-TCH959)           |     |            | ZP_04865955.1 |
| orf 20 | 16377..17696, 440 aa | Transposase for IS1181                                     | NI              |                  | NI          | NI     | NI         |            | NI         |                | 99 ( <i>S. aureus</i> A9781) |     |            | ZP_05642705.1 |
| orf 21 | 18368..17940, 143 aa | PhnB like proteins <sup>e</sup>                            | 100             | 118.9            | 99.3        | GR1.21 | 99.3       | BAD2482.1  | 99.3       | YP_005296517.1 |                              |     |            |               |
| orf 22 | 18449..19378, 310 aa | HP (transcriptional regulation response to unknown ligand) | 100             | 118.10           | 100         | GR1.22 | NI         |            | 100        | YP_005296518.1 |                              |     |            |               |
| orf 23 | 19540..21528, 663 aa | HP                                                         | 100             | 118.11           | 100         | GR1.23 | 99.85      | BAD2483.1  | 99.8       | YP_005296522.1 |                              |     |            |               |
| orf 24 | 21723..22832, 370 aa | HP (Family A polymerase functions in DNA repair)           | 100             | 118.12           | 100         | GR1.24 | 96.75      | BAD2483.1  | 100        | YP_005296523.1 |                              |     |            |               |
| orf 25 | 22825..23193, 123 aa | HP                                                         | 100             | 118.14           | 100         | GR1.26 | 65.57      | BAD2483.1  | 100        | YP_005296524.1 |                              |     |            |               |
| orf 26 | 23193..24809, 539 aa | HP (distant relative to ccr)                               | 100             | 118.15           | 100         | GR1.27 | 77.09      | BAD2483.1  | 100        | YP_005296525.1 |                              |     |            |               |
| orf 27 | 24802..24879, 26 aa  | HP (IS-125)                                                | 100             | 118.16           | 100         | GR1.28 | NI         |            | 100        | YP_005296508.1 |                              |     |            |               |
| orf 28 | 25034..25285, 84 aa  | Truncated ccrC (serine recombinase domain)                 | NI              |                  | 97.59       | GR1.29 | 89.16      | BAD2483.1  | 96.37      | YP_005296526.1 |                              |     |            |               |
| orf 29 | 25282..26718, 479 aa | ccrC                                                       | 97.07           | 118.17           | 100         | GR1.29 | 94.97      | BAD2483.1  | 97.49      | YP_005296526.1 |                              |     |            |               |
| orf 30 | 26807..27145, 113 aa | HP                                                         | 98.21           | 118.18           | 100         | GR1.31 | 91.96      | BAD2483.1  | 99.11      | YP_005296527.1 |                              |     |            |               |

**Table 2. Cont.**

|        |                      | Homology (%) <sup>a</sup>                                              |            |                  |             |        |            |            |            |                |                                   |                |            |        |  |  |
|--------|----------------------|------------------------------------------------------------------------|------------|------------------|-------------|--------|------------|------------|------------|----------------|-----------------------------------|----------------|------------|--------|--|--|
|        |                      | 118 (ST772)                                                            |            |                  | GR1 (ST672) |        |            | WIS (ST45) |            |                | M013 (ST59)                       |                |            | Others |  |  |
| Orfs   | Position             | Predicted Function                                                     | % Identity | C O <sup>b</sup> | % Identity  | C O    | % Identity | C O        | % Identity | C O            | % Identity                        | C O            | % Identity | C O    |  |  |
| orf 31 | 27148..27237, 30 aa  | HP                                                                     | NI         | NI               | 100         | GR1.32 | NI         | GR1.32     | NI         | NI             | 100 (HP)                          | EJD84594.1     |            |        |  |  |
| orf 32 | 27239..27550, 104 aa | HP                                                                     | 100        | 118.19           | 100         | GR1.33 | 87.38      | BAD24837.1 | 85.44      | YP_005296528.1 |                                   |                |            |        |  |  |
| orf 33 | 27568..28071, 168 aa | HP                                                                     | 100        | 118.20           | 100         | GR1.34 | 92.81      | BAD24838.1 | 95.21      | YP_005296529.1 |                                   |                |            |        |  |  |
| orf 34 | 28085..28306, 74 aa  | HP                                                                     | 100        | 118.21           | 100         | GR1.35 | NI         |            | 93.15      | YP_005296530.1 |                                   |                |            |        |  |  |
| orf 35 | 31499..28380,1040aa  | hsdR (type I restriction enzyme R protein)                             | 100        | 118.22           | 100         | GR1.36 | 96.54      | BAD24840.1 | 97.02      | YP_005296531.1 |                                   |                |            |        |  |  |
| orf 36 | 32640..31483, 386 aa | hsdS (type I restriction modification DNA specificity domain)          | 100        | 118.23           | 100         | GR1.37 | 36.56      | BAD24841.1 | 34.72      | YP_005296532.1 | 80 ( <i>S. aureus</i> LGA251)     | YP_005754070.1 |            |        |  |  |
| orf 37 | 34144..32630, 505 aa | hsdM (type I restriction modification DNA methyltransferase subunit M) | 100        | 118.24           | 100         | GR1.38 | 96.23      | BAD24842.1 | 98.21      | YP_005296533.1 |                                   |                |            |        |  |  |
| orf 38 | 34329..35204, 292 aa | HP (nucleotidyltransferase domain of 2'-5'-oligoadenylate synthetase)  | 100        | 118.25           | 100         | GR1.39 | NI         |            | NI         |                | 98 ( <i>S.epidermidis</i> W23144) | ZP_04797658.1  |            |        |  |  |
| orf 39 | 35428..35976, 183 aa | HP                                                                     | 100        | 118.26           | 100         | GR1.40 | NI         |            | NI         |                | 99 ( <i>S.epidermidis</i> W23144) | ZP_04797657.1  |            |        |  |  |

<sup>a</sup>Identity of the amino acid sequence to each ortholog (orf);

<sup>b</sup>Corresponding Ortholog in the reference strain,

<sup>c</sup>Hypothetical Protein;

<sup>d</sup>ugpQ: glycerophosphoryl diester phosphodiesterase;

<sup>e</sup>phnB-like proteins adopting structural fold similar to bleomycin resistance proteins;

<sup>f</sup>No Identity.

doi:10.1371/journal.pone.0094293.t002

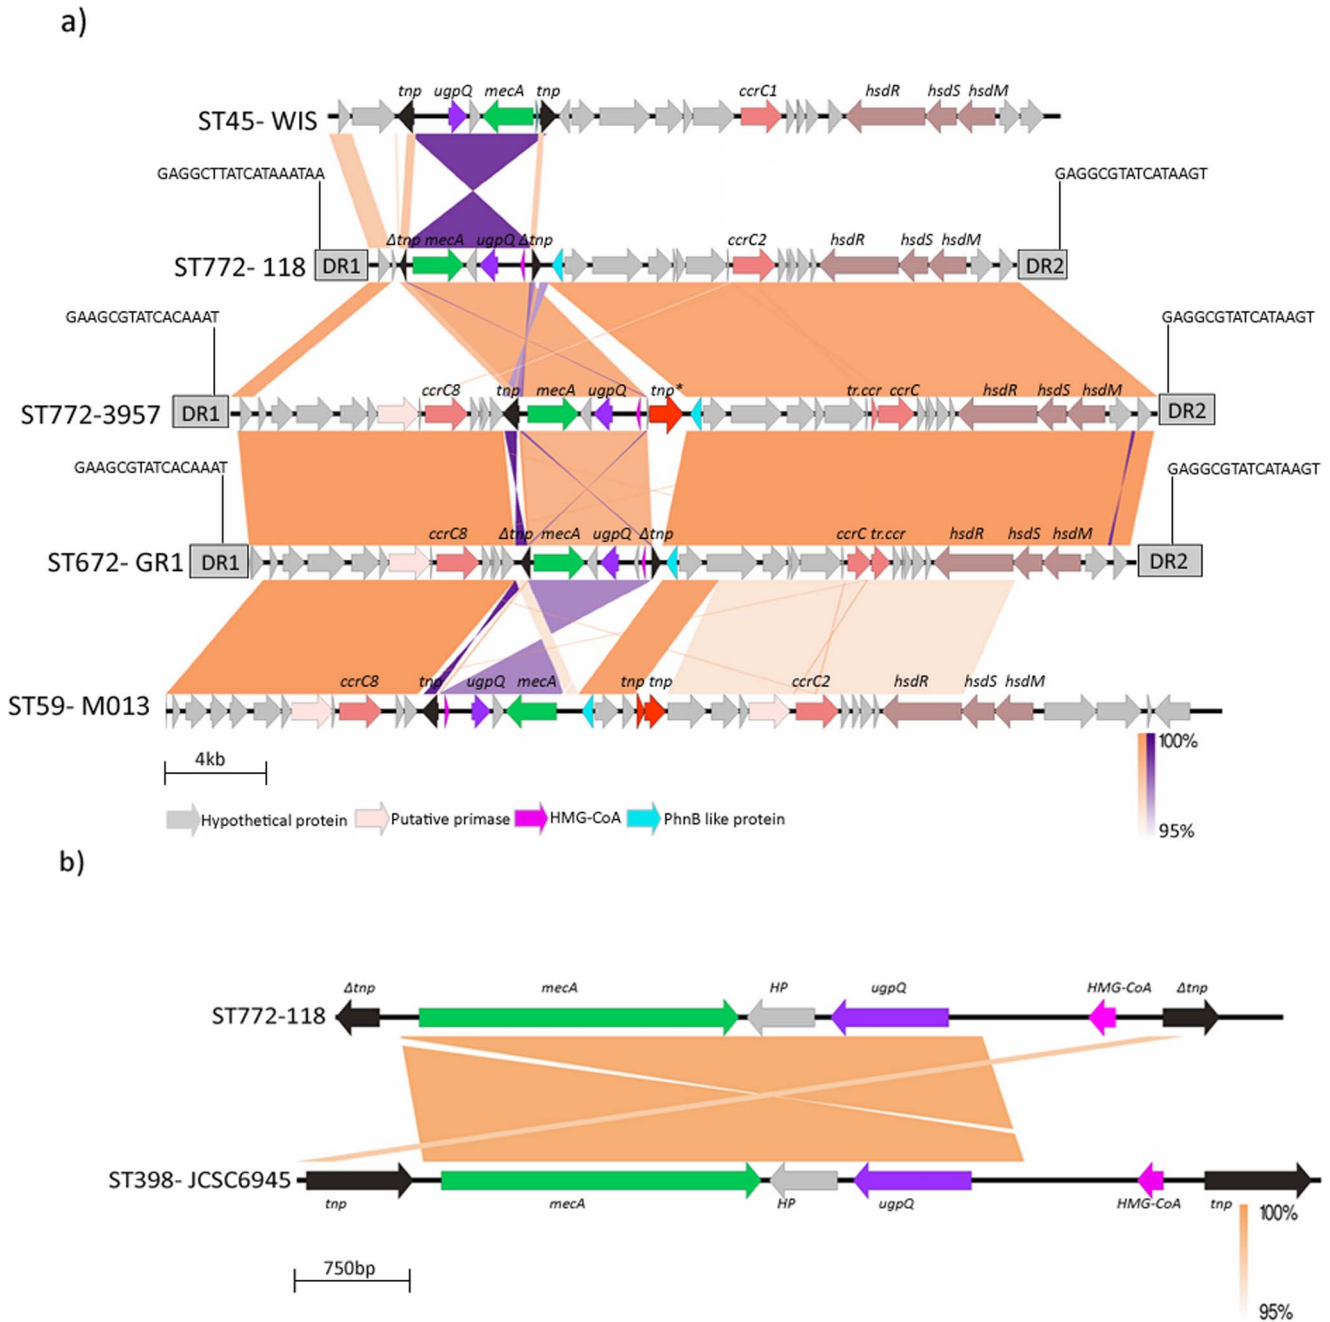

**Figure 1. Schematic representation of genetic structures of type V SCCmec elements.** a) Schematic representation and comparison of genetic structures of type V (5C2) SCCmec element of 118 (ST772), and type V (5C2&5) SCCmec elements of 3957 (ST772) and GR1(ST672) and the reference strains WIS (ST45) and M013 (ST59). Structures of these elements are illustrated based on nucleotide sequences deposited in DDBJ/EMBL/GenBank database under the accession numbers AB777516, AB781446, AB781448, AB121219 and CP003166. Coding sequences are marked in the direction of transcription as arrows. Transposases for IS431 are indicated in black arrows. Intact transposases for IS431 have been labeled as *tnp*, truncated transposases for IS431 have been labeled as  $\Delta$ *tnp*. Transposase for IS1181 and transposase for M013 are indicated in red arrows and have been labeled as *tnp\** and *tnp*, respectively. Color coding for the genes not labeled are shown in the legend. Conserved region with more than 95% homology are indicated in light brown and *mec* gene complex inversions are shown in purple as determined by BLASTN. Genomic picture was generated using Easy Fig software. 1b) Comparison of *mec* gene complexes in *S. aureus* 118 and JCSC6945. doi:10.1371/journal.pone.0094293.g001

S1. The designations for the truncated *ccrCs* have to await the decision from the International Working Group on SCCmec elements.

The type V SCCmec elements of *S. aureus* 3957 and GR1 are composite cassettes (5C2&5) formed by the integration of type V

SCCmec element into a SCC element of a MSSA isolate and have in all probability evolved independently from the more common 5C2 ST772 isolates.

SCCmec element in *S. aureus* 3957 is an exception to other ST772 isolates as it carries the region similar to M013 in GR1

(ST672). To check the frequency of appearance of SCCmec elements similar to 3957, we screened 45 ST 772 isolates from our collection with primers specific for 3957 and did not find any other ST772 isolate with a unique SCCmec element found in 3957. Hence it appears that the recombination event is not frequent although it is stable in this isolate. ST672 may not be highly prevalent for the same reason.

### Restriction-Modification systems

Like other type V SCCmec elements, ST772 and ST672 elements code for a complete type I restriction modification system proteins hsdR, hsdS and hsdM. HsdR and hsdM are conserved among all ST772s and ST672 with respect to WIS and M013, while hsdS domain is different from that of WIS and M013 and has 80% similarity to bovine *S. aureus* LGA251 carrying SCCmec XI.

### Hypothetical Proteins

Several HPs from *S. aureus* 3957 and GR1 are not identified among the other six ST772 isolates but have 100% identity with M013 proteins. To our knowledge, ST 59 *S. aureus* isolates have not been detected in India but are present in Taiwan, China and Hong Kong. A common HA-MRSA present in India, China and Taiwan is ST239 which is the first bacterial hybrid to be found in nature [29]. We compared the nucleotide sequences (blastn) of SCCmec element of *S. aureus* 85/2082 (AB037671.1) with VH60, 3957 and GR1, and found 54%, 64%, and 67% query coverage respectively, with >97% identity. Blastp results indicate that 22/40, 21/39 and 10/28 proteins in GR1, 3957 and VH60 have more than 70% identity to 85/2082 SCCmec element proteins (Table S3). More specifically, 9 proteins between orfs 2-13 in GR1 and 3957 have more than 90% identity with 85/2082 and M013 proteins. It is likely that some of these proteins have originated from ST239 through horizontal transfer to generate SCCmec elements of ST772 and ST672. M013 SCCmec element has perhaps been generated through similar independent recombinations. HPs coded by orf 10 and orf 11 are homologous with SCCmec elements of ZH47 and *S. epidermidis* (CAL22884.1 and EJE32225.1). The last two HPs present in ST772 and ST672 SCCmec elements originate from *S. epidermidis* (ZP\_04797658.1 and ZP\_04797657.1) and are not present in WIS or M013.

SCCmec V element present in most Indian ST772 isolates is the smallest perhaps rendering the organism fittest to survive. The generation of Indian ST772 and ST672 type V SCCmec elements point to novel rearrangements due to recombination events (deletion/addition) involving other *S. aureus* including ST239 isolates, bovine SCCmec elements and elements from other Staphylococci.

## Materials and Methods

### Ethical Statement

The sequenced *S. aureus* and other ST772 isolates were obtained from clinicians from different hospitals in India. These hospitals have their own ethical boards which give them permission to collect these samples. M013 and WIS were obtained through the courtesy of Prof. Etienne, University of Lyon, France. The eight sequenced and 45 ST772 *S. aureus* isolates used to check the

frequency of appearance of SCCmec elements similar to *S. aureus* 3957, were part of this collection.

The collection and molecular characterization of *S. aureus* isolates were carried out as described in earlier publications [16,17]. Whole genome sequencing of two *S. aureus* isolates, one ST772 and one ST672 respectively, have been described earlier [22,24]. Whole genome sequencing was performed using Illumina HiSeq-1000 sequencer. The raw reads obtained were assembled into contigs using VELVET [30], and gene predictions were made using GLIMMER 3.02 [31]. The relative arrangement of the SCCmec structural elements in different contigs was determined by BLASTP and TBLASTN [32]. The arrangement of contigs corresponding to SCCmec elements was determined by Mummer [33]. The sequences were validated and joined by performing overlapping PCRs (Figure S2) and Sanger sequencing (Figure S3). We used previously published chromosome- SCCmec junction sequences to identify the sequences of SCCmec elements present in ST772 and ST672 [10,22,24]. The SCCmec element annotations for all eight isolates have been deposited in the DNA database of Japan (DDBJ).

## Supporting Information

**Figure S1 ClustalW alignment of *ccrC1* (allele 5) of JCSC1435 with 3957(Orf28 and 29) and GR1 (Orf 29 and 30).**

(DOC)

**Figure S2 Verification of SCCmec contig sequences by overlapping PCRs.**

(DOC)

**Figure S3 Example of Sanger sequencing.**

(PDF)

**Table S1 Comparison of orfs from SCCmec elements of *S. aureus* VH60 and corresponding orthologs of other ST772, ST672 and reference strains.**

(XLS)

**Table S2 Length of IS431 transposases among sequenced ST772 and ST672 isolates.**

(DOCX)

**Table S3 Comparison of SCCmec element orfs of 85/2082 with corresponding orthologs of VH60, 3957 and GR1.**

(XLS)

## Acknowledgements

We thank the clinicians for *S. aureus* isolates from clinical samples. We also would like to acknowledge Dr. Aswin Sai Narain Seshasayee from NCBS for helping in data analysis and for a critical review of the paper. We thank the anonymous reviewers of this journal for their careful review of the earlier versions of this paper. Genomic DNA sequencing was performed by the Next-Generation Genomics Laboratory facility at the Centre for Cellular and Molecular Platforms at NCBS, Bangalore.

## Author Contributions

Conceived and designed the experiments: GA. Performed the experiments: JB SP. Analyzed the data: JB SP GA. Wrote the paper: GA.

## References

1. Grundmann H, Aires-de-Sousa M, Boyce J, Tiemersma E (2006) Emergence and resurgence of methicillin-resistant *Staphylococcus aureus* as a public-health threat. *Lancet* 368: 874–885.
2. Zetola N, Francis JS, Nuermberger EL, Bishai WR (2005) Community-acquired methicillin-resistant *Staphylococcus aureus*: an emerging threat. *Lancet Infect Dis* 5: 275–286.

3. Diep BA, Otto M (2008) The role of virulence determinants in community-associated MRSA pathogenesis. *Trends Microbiol* 16: 361–369.
4. Chambers HF, De Leo FR (2009) Waves of resistance: *Staphylococcus aureus* in the antibiotic era. *Nat Rev Microbiol* 7: 629–641.
5. Ito T (2009) International Working Group on the Classification of Staphylococcal Cassette Chromosome Elements (IWG-SCC) Classification of staphylococcal cassette chromosome *mec* (SCCmec): guidelines for reporting novel SCCmec elements. *Antimicrob Agents Chemother* 53: 4961–4967.
6. Ito T, Hiramatsu K, Tomasz A, de Lencastre H, Perreten V, et al. (2012) International Working Group on the Classification of Staphylococcal Cassette Chromosome Elements (IWG-SCC) Guidelines for Reporting Novel *mecA* Gene Homologues. *Antimicrob Agents Chemother* 56: 4997–4999.
7. Li S, Skov RL, Han X, Larsen AR, Larsen J, et al. (2011) Novel types of staphylococcal cassette chromosome *mec* elements identified in CC398 methicillin resistant *Staphylococcus aureus* strains. *Antimicrob Agents Chemother* 55: 3046–3050.
8. Shore AC, Deasy EC, Slickers P, Brennan G, O'Connell B, et al. (2011) Detection of Staphylococcal Cassette Chromosome *mec* Type XI Carrying Highly Divergent *mecA*, *mecI*, *mecR1*, *bla<sub>Z</sub>*, and *ccr* Genes in Human Clinical Isolates of Clonal Complex 130 Methicillin-Resistant *Staphylococcus aureus*. *Antimicrob Agents Chemother* 55:3765–3773.
9. Popovich KJ, Weinstein RA, Hota B (2008) Are community associated methicillin resistant *Staphylococcus aureus* (MRSA) strains replacing traditional nosocomial MRSA strains? *Clin Infect Dis* 46:787–794.
10. Ito T, Ma XX, Takeuchi F, Okuma K, Yuzawa H, et al. (2004) Novel Type V Staphylococcal Cassette Chromosome *mec* Driven by a Novel Cassette Chromosome Recombinase, *ccrC*. *Antimicrob Agents Chemother* 48: 2637–2651.
11. O'Brien FG, Coombs GW, Pearson JC, Christiansen KJ, Grubb WB (2005) Type V Staphylococcal Cassette Chromosome *mec* in Community *Staphylococci* from Australia. *Antimicrob Agents Chemother* 49: 5129–5132.
12. Boyle-Vavra S, Ereshesky B, Wang C, Daum RS (2005) Successful Multiresistant Community-Associated Methicillin-Resistant *Staphylococcus aureus* Lineage from Taipei, Taiwan, That Carries Either the Novel Staphylococcal Cassette Chromosome *mec* (SCCmec) Type V<sub>T</sub> or SCCmec Type IV. *J Clin Microbiol* 43: 4719–4730.
13. Takano T, Higuchi W, Otsuka T, Baranovich T, Enany S, et al. (2008) Novel Characteristics of Community-Acquired Methicillin-Resistant *Staphylococcus aureus* Strains Belonging to Multilocus Sequence Type 59 in Taiwan. *Antimicrob Agents Chemother* 52: 837–845.
14. Huang TW, Chen F, Miu WC, Liao TL, Lin AC, et al. (2012) Complete genome sequence of *Staphylococcus aureus* M013, a pvl-positive, ST59-SCCmec type V strain isolated in Taiwan. *J Bacteriol* 194:1256–1257.
15. Afroz S, Kobayashi N, Nagashima S, Alam MM, Hossain AB, et al. (2008) Genetic Characterization of *Staphylococcus aureus* Isolates Carrying Pantone-Valentine Leukocidin Genes in Bangladesh. *Jpn J Infect Dis* 61: 393–396.
16. Shambat SM, Nadig S, Prabhakara S, Bes M, Etienne J, et al. (2012) Clonal complexes and virulence factors of *Staphylococcus aureus* from several cities in India. *BMC Microbiology* 12: 64–72.
17. Nadig S, Velusamy N, Lalitha P, Kar S, Sharma S, et al. (2012) *Staphylococcus aureus* eye infections in two Indian hospitals: emergence of ST772 as a major clone. *Clinical Ophthalmology* 6: 165–173.
18. Neela V, Ehsanollah GR, Zamberi S, Van Belkum A, Mariana NS (2009) Prevalence of Pantone-Valentine leukocidin genes among carriage and invasive *Staphylococcus aureus* isolates in Malaysia. *International Journal of Infectious Diseases* 13:e131–e132.
19. Brennan GI, Shore AC, Corcoran S, Tecklenborg S, Coleman DC, et al. (2012) Emergence of Hospital- and Community-Associated Pantone-Valentine Leukocidin-Positive Methicillin-Resistant *Staphylococcus aureus* Genotype ST772-MRSA-V in Ireland and Detailed Investigation of a ST772-MRSA-V Cluster in a Neonatal Intensive Care Unit. *J Clin Microbiol* 50: 841–847.
20. Yamaguchi T, Nakamura I, Chiba K, Matsumoto T (2012) Epidemiological and Microbiological Analysis of Community-Associated Methicillin-Resistant *Staphylococcus aureus* Strains Isolated from a Japanese Hospital. *Jpn J Infect Dis* 65: 175–178.
21. Zanger P, Nurjadi D, Schleucher R, Scherbaum H, Wolz C, et al. (2012) Import and Spread of Pantone-Valentine Leukocidin-Positive *Staphylococcus aureus* Through Nasal Carriage and Skin Infections in Travelers Returning From the Tropics and Subtropics. *Clin Infect Dis* 54: 483–488.
22. Khedkar S, Prabhakara S, Loganathan RM, Chandana S, Gowda M, et al. (2012) Draft Genome Sequence of *Staphylococcus aureus* ST672, an Emerging Disease Clone from India. *J Bacteriol* 194: 6946–6947.
23. Coombs GW, Monecke S, Pearson JC, Tan H, Chew YK, et al. (2011) Evolution and diversity of community-associated methicillin-resistant *Staphylococcus aureus* in a geographical region. *BMC Microbiol* 11: 215–227.
24. Prabhakara S, Khedkar S, Loganathan RM, Chandana S, Gowda M, et al. (2012) Draft genome sequence of *Staphylococcus aureus* 118 (ST772), a major disease clone from India. *J Bacteriol* 194:3727–3728.
25. Sullivan MJ, Petty NK, Beatson SA (2011) Easyfig: a genome comparison visualizer. *Bioinformatics Applications note* 27: 1009–1010.
26. Schijffelen MJ, Boel CHE, van Strijp JAG, Fluit AC (2010) Whole genome analysis of a livestock-associated methicillin-resistant *Staphylococcus aureus* ST398 isolate from a case of human endocarditis. *BMC Genomics* 11: 376–386.
27. Golding GR, Bryden L, Levett PN, McDonald RR, Wong A, et al. (2012) Whole-genome sequence of livestock-associated st398 methicillin-resistant *Staphylococcus aureus* Isolated from Humans in Canada. *J Bacteriol* 194: 6627–6628.
28. Chlebowicz MA, Bosch T, Sabat AJ, Arends JP, Grundman H, et al. (2013) Distinction of Staphylococcal Cassette Chromosome *mec* type V elements from *Staphylococcus aureus* ST398. *Int J Med Microbiol* 303: 422–432.
29. Smyth DS, McDougal LK, Gran FW, Manoharan A, Enright MC, et al. (2009) Population Structure of a Hybrid Clonal Group of Methicillin-Resistant *Staphylococcus aureus*, ST239-MRSA-III. *PLoS ONE* 5(1) e8582.
30. Zerbino DR, Birney E (2008) Velvet: algorithms for de novo short read assembly using de Bruijn graphs. *Genome Res* 18: 821–829.
31. Delcher A, Harmon D, Kasif S, White O, Salzberg S (1999) Improved microbial gene identification with GLIMMER. *Nucl Acids Res* 27: 4636–4641.
32. Altschul SF, Gish W, Miller W, Myers EW, Lipman DJ (1990) Basic local alignment search tool. *J Mol Biol* 215: 403–410.
33. Kurtz S, Phillippy A, Delcher AL, Smoot M, Shumway M, et al. (2004) Versatile and open software for comparing large genomes. *Genome Biology* 5: R12.
